# Supplementary material for: Towards stereochemical control: A short formal enantioselective total synthesis of pumiliotoxins 251D and 237A
Source: publisher site journal article supplement (doi:10.3762/bjoc.9.271), 2013-11-05

# **Towards stereochemical control: A short formal enantioselective total synthesis of pumiliotoxins 251D and 237A**

Jie Zhang<sup>1</sup>, Hong-Kui Zhang\*<sup>1</sup> and Pei-Qiang Huang\*<sup>1,2</sup>

Address: <sup>1</sup>Department of Chemistry and Fujian Provincial Key Laboratory of Chemical Biology, College of Chemistry and Chemical Engineering, Xiamen University, Xiamen, Fujian 361005, P. R. China and <sup>2</sup>State Key Laboratory of Applied Organic Chemistry Lanzhou University, Lanzhou 730000, P. R. China

Email: Hong-Kui Zhang - hkzhang@xmu.edu.cn; Pei-Qiang Huang - pqhuang@xmu.edu.cn

\* Corresponding author

## **<sup>1</sup>H and <sup>13</sup>C NMR of key compounds**

$^1\text{H}$  and  $^{13}\text{C}$  NMR spectra of compound **14**:

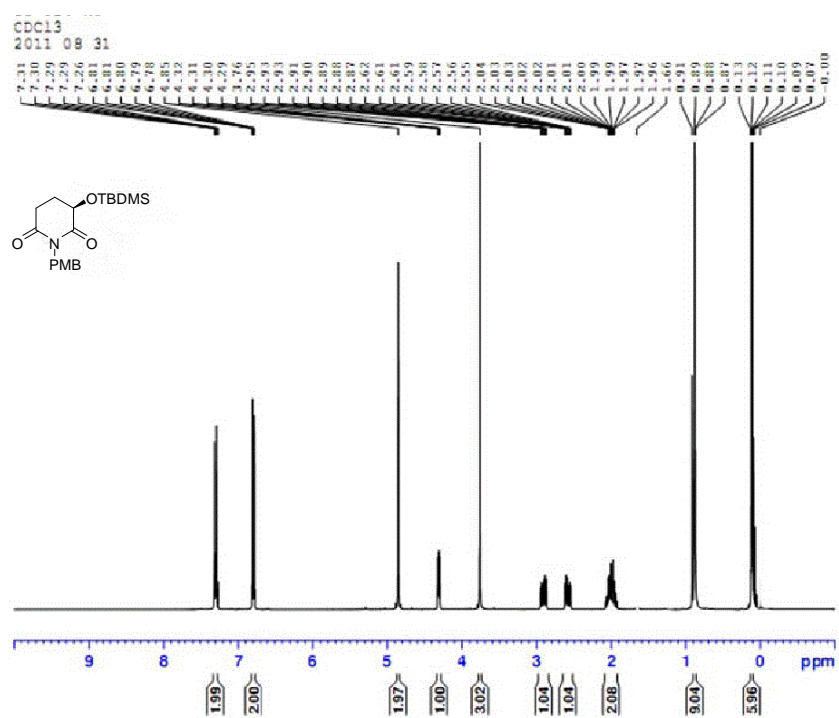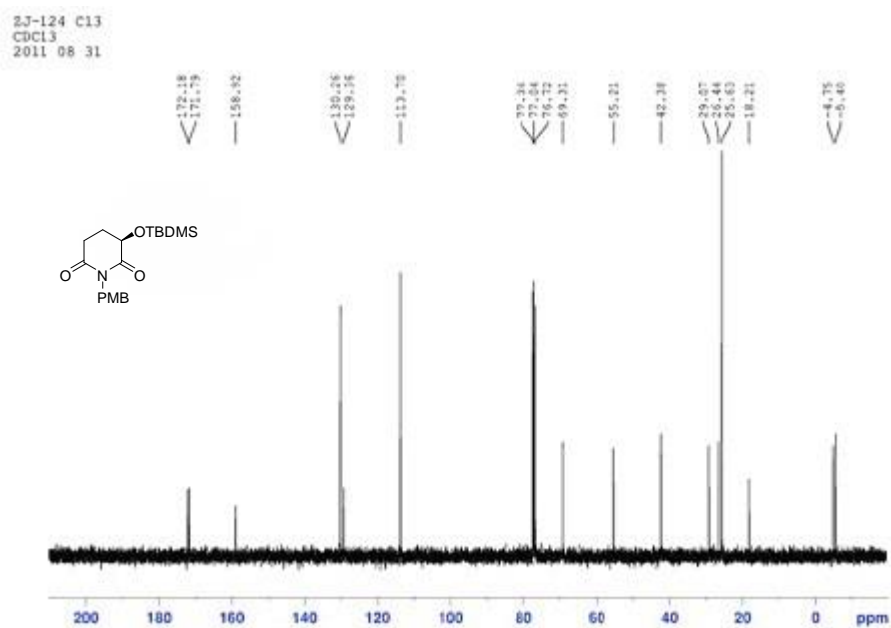

$^1\text{H}$  and  $^{13}\text{C}$  NMR spectra of compound **18**:

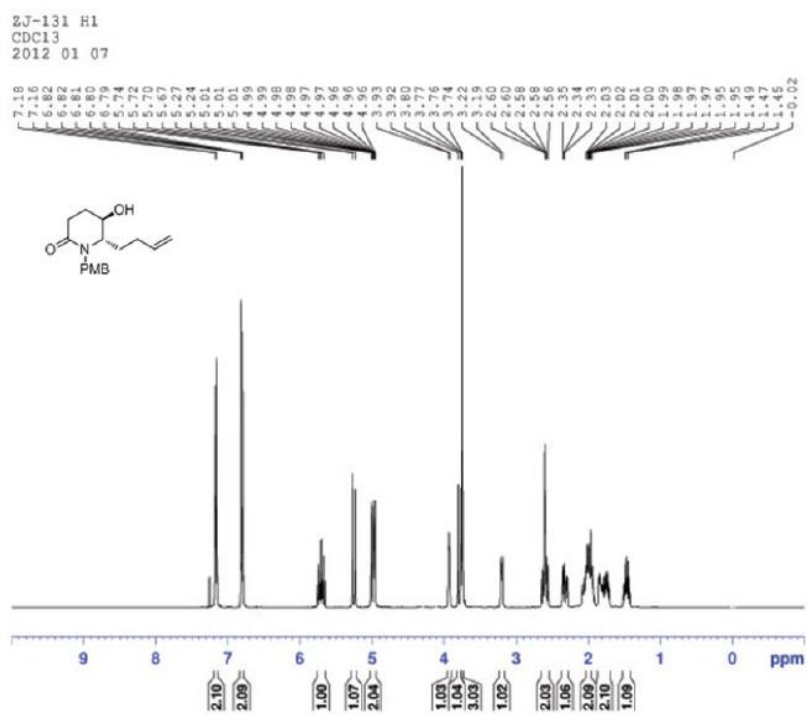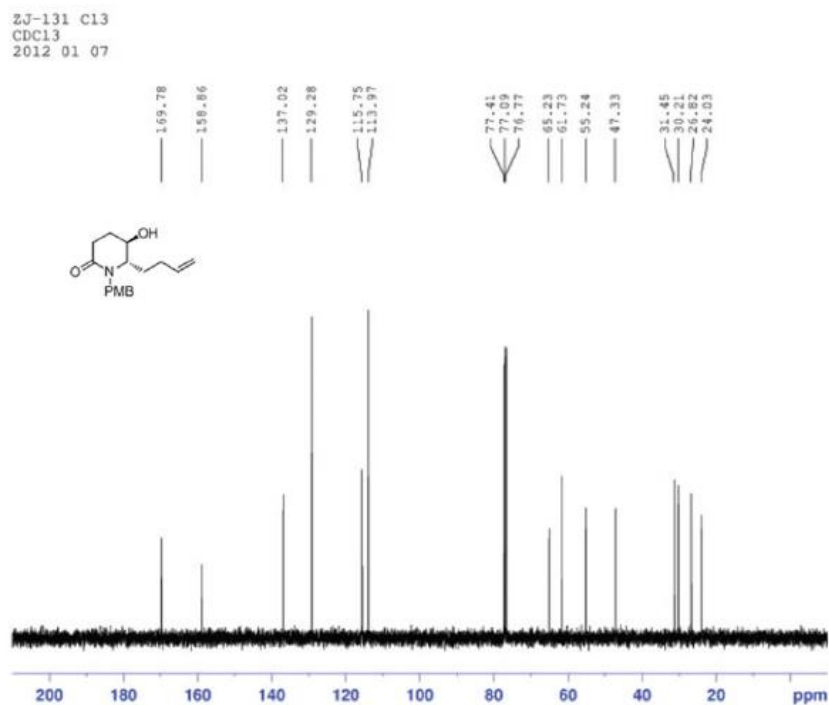

$^1\text{H}$  and  $^{13}\text{C}$  NMR spectra of compound **10**:

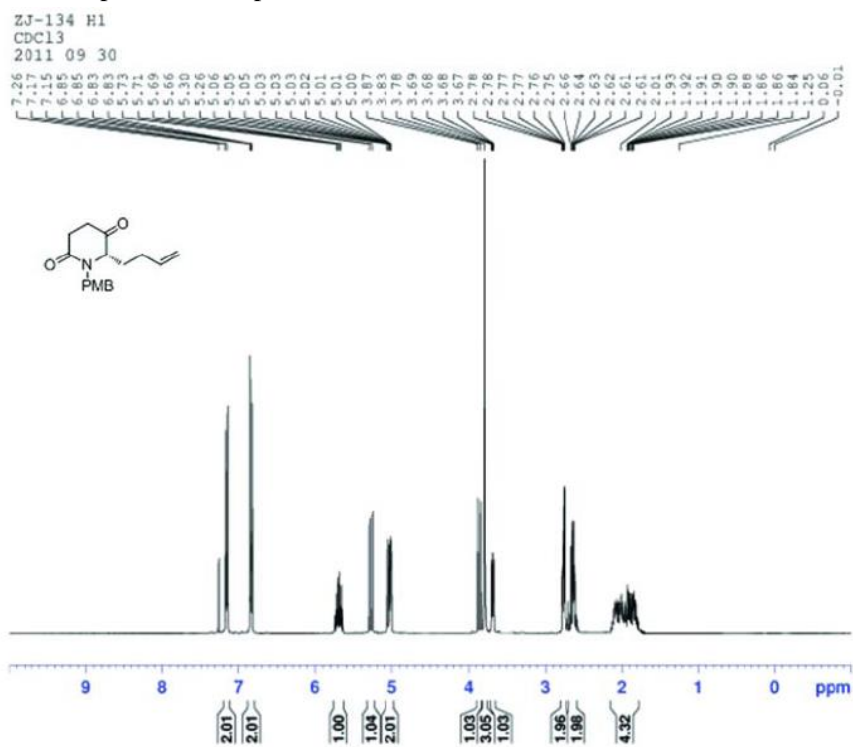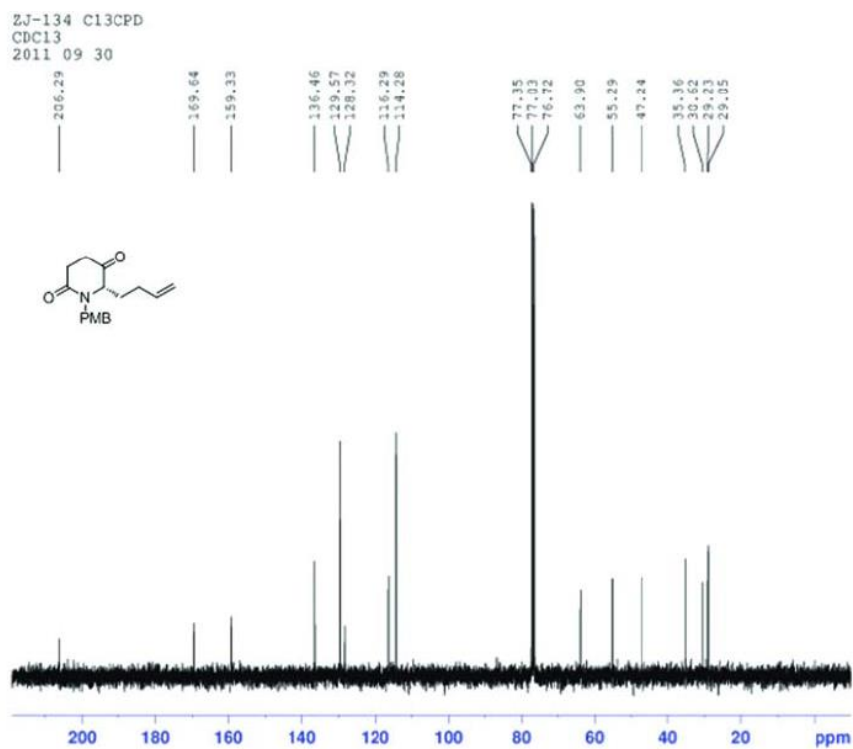

$^1\text{H}$  and  $^{13}\text{C}$  NMR spectra of compound **11**:

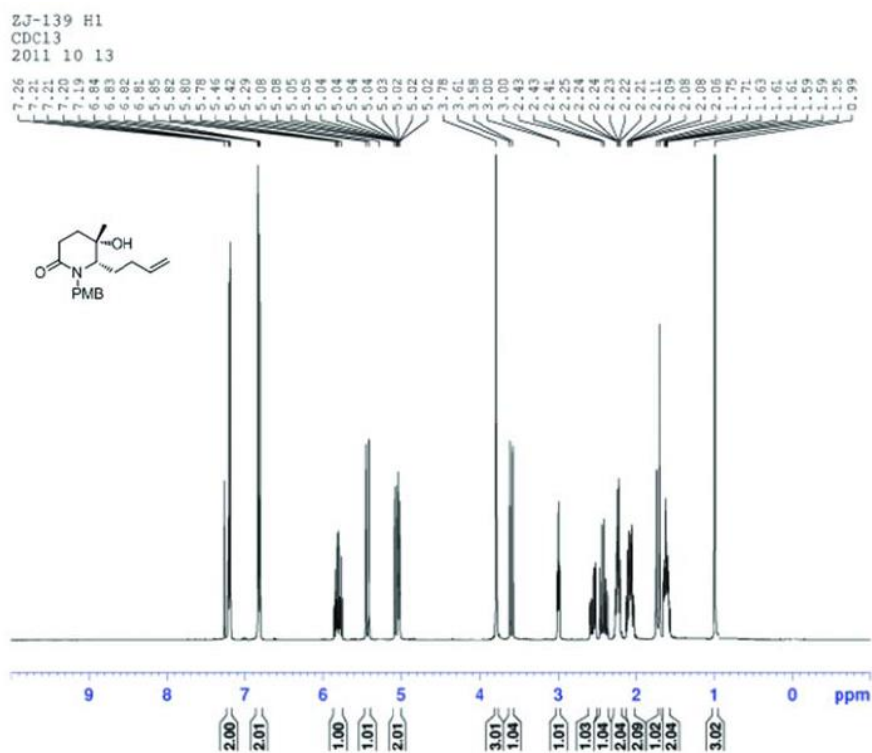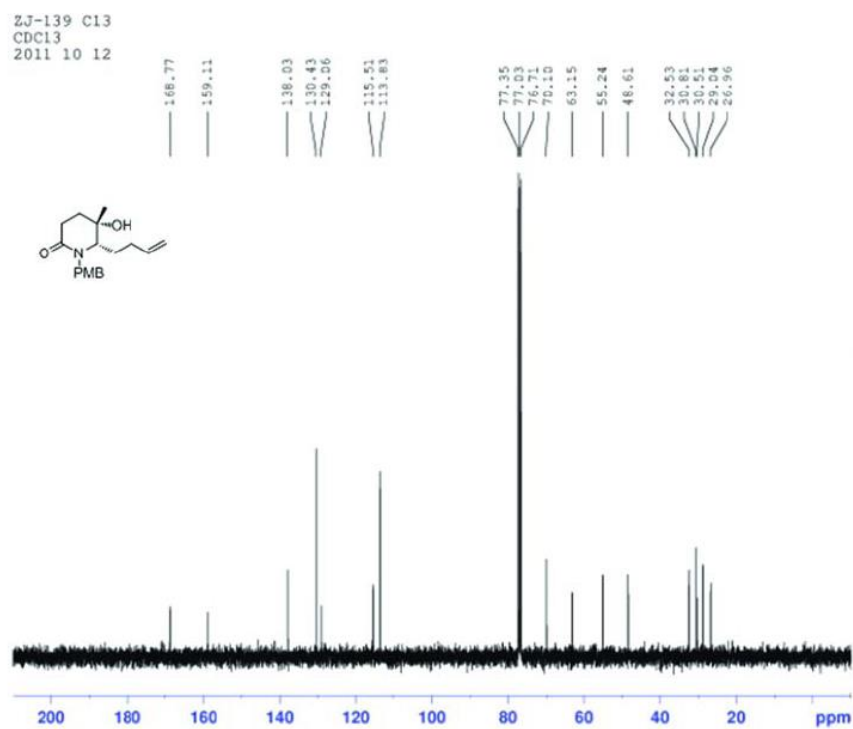

$^1\text{H}$  and  $^{13}\text{C}$  NMR spectra of compound **22**:

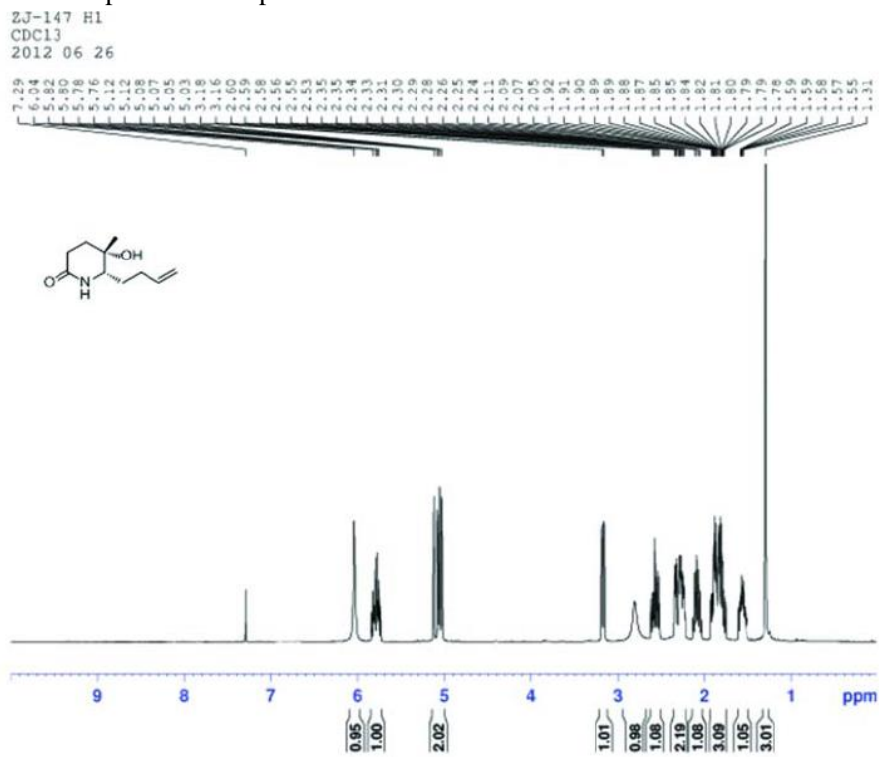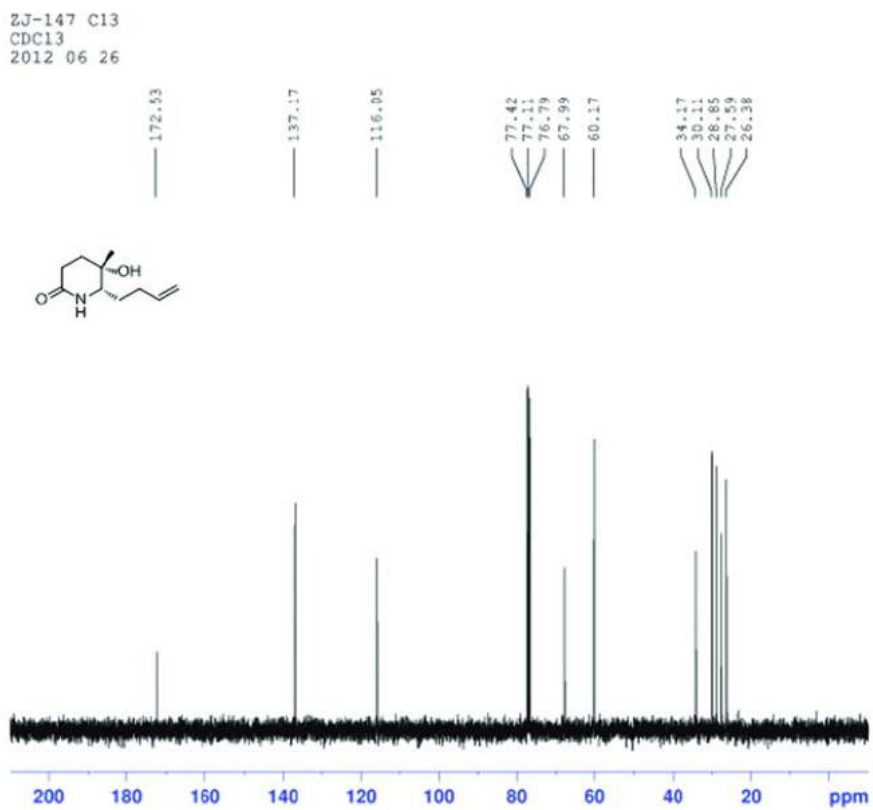

$^1\text{H}$  and  $^{13}\text{C}$  NMR spectra of compound **5**:

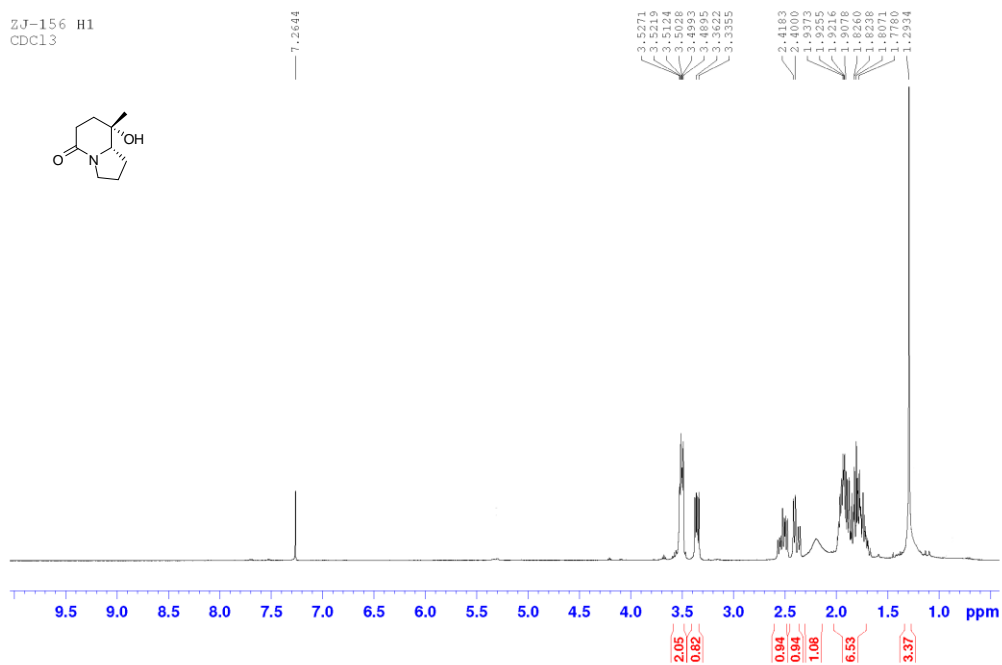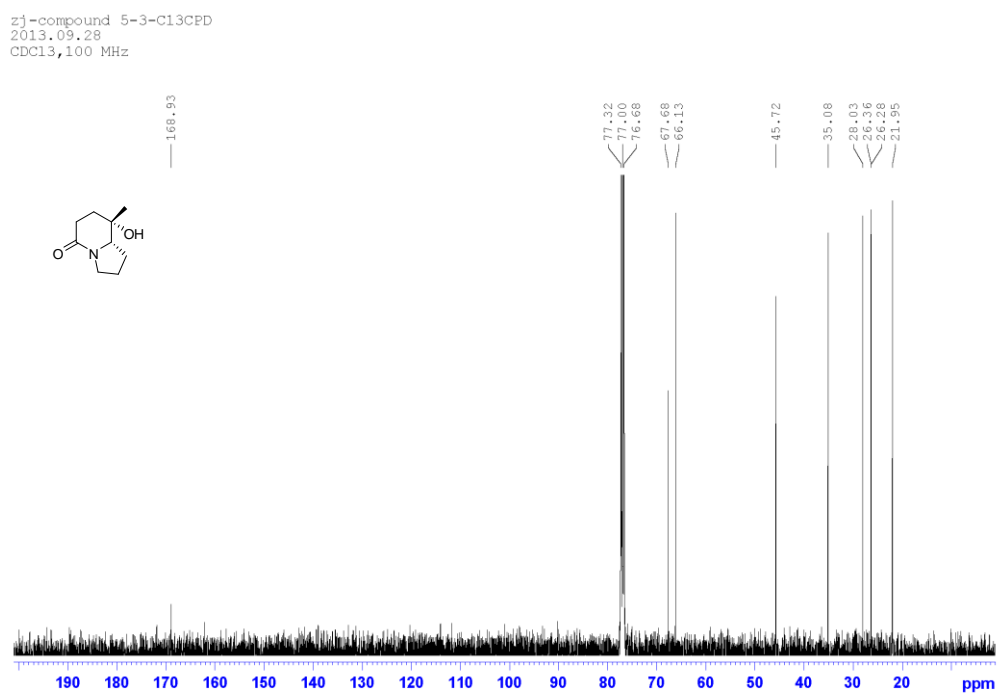

Create PDF files without this message by purchasing novaPDF printer (<http://www.novapdf.com>)

$^1\text{H}$  and  $^{13}\text{C}$  NMR spectra of compound **23**:

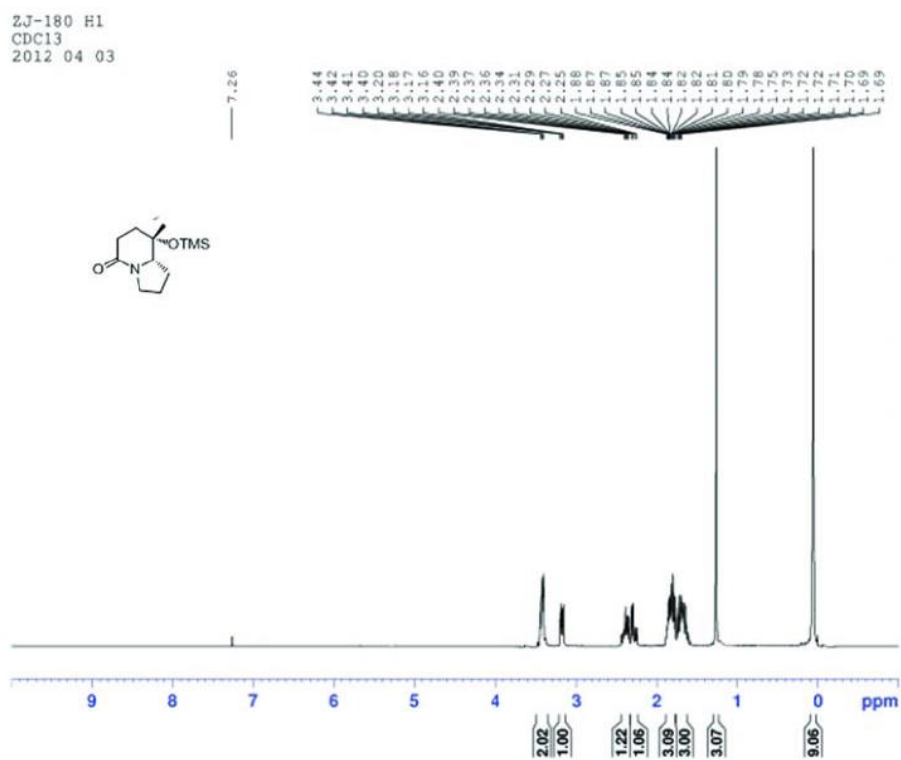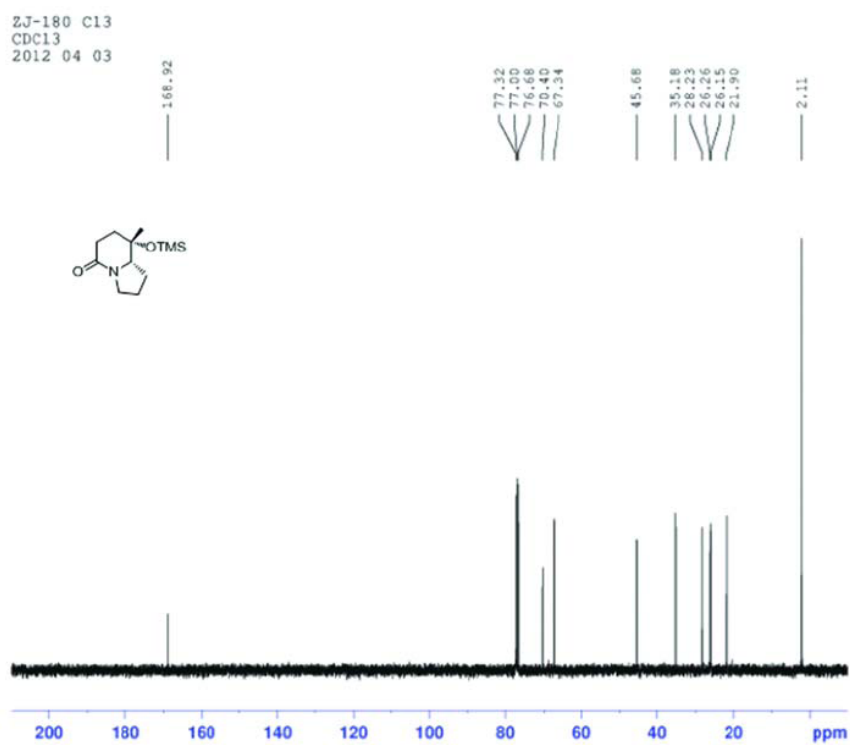

Supplement: Additional file 1 [file 1860-5397-9-271-S1.pdf]
